# Supplementary material for: Checkpoint kinase 1 is essential for fetal and adult hematopoiesis
Source: PubMed Central journal article supplement (PMC6680171; doi:10.15252/embr.201847026), 2019-06-17
Supplement: EMBR-20-e47026-s001.pdf [file EMBR-20-e47026-s001.pdf]

## APPENDIX

# Checkpoint kinase-1 is essential for fetal and adult hematopoiesis

Fabian Schuler<sup>1</sup>, Sehar Afreen<sup>2,3</sup>, Claudia Manzl<sup>4</sup>, Georg Häcker<sup>5</sup>, Miriam Erlacher<sup>2,6</sup> and Andreas Villunger<sup>1,7,8</sup>

<sup>1</sup>Division of Developmental Immunology, Biocenter, Medical University of Innsbruck, Innsbruck, Austria.

<sup>2</sup>Division of Pediatric Hematology and Oncology, Department of Pediatrics and Adolescent Medicine, Faculty of Medicine, University of Freiburg, Freiburg, Germany. <sup>3</sup>Faculty of Biology, University of Freiburg, Freiburg, Germany. <sup>4</sup>Institute of Pathology, Neuropathology and Molecular pathology, Medical University of Innsbruck, Innsbruck, Austria. <sup>5</sup>Institute of Medical Microbiology and Hygiene, University Medical Center Freiburg, Freiburg, Germany. <sup>6</sup>German Cancer Consortium (DKTK), Freiburg, Germany and German Cancer Research Center (DKFZ), Heidelberg, Germany. <sup>7</sup>CeMM Research Center for Molecular Medicine of the Austrian Academy of Sciences, Vienna 1090, Austria. <sup>8</sup>Ludwig Boltzmann Institute for Rare and Undiagnosed Diseases, Vienna 1090, Austria

### **Table of Contents**

|                                                                                                                         |        |
|-------------------------------------------------------------------------------------------------------------------------|--------|
| <b>Appendix Figure S1:</b> CHK1-inhibition kills primary murine hematopoietic stem and progenitor (HSPC) cells.         | page 2 |
| <b>Appendix Figure S2:</b> Tracing acute depletion of Chk1 in the hematopoietic system based on GFP-reporter expression | page 3 |
| <b>Appendix Figure S3:</b> Tracing acute depletion of Chk1 in the hematopoietic system based on GFP-reporter expression | page 4 |

A

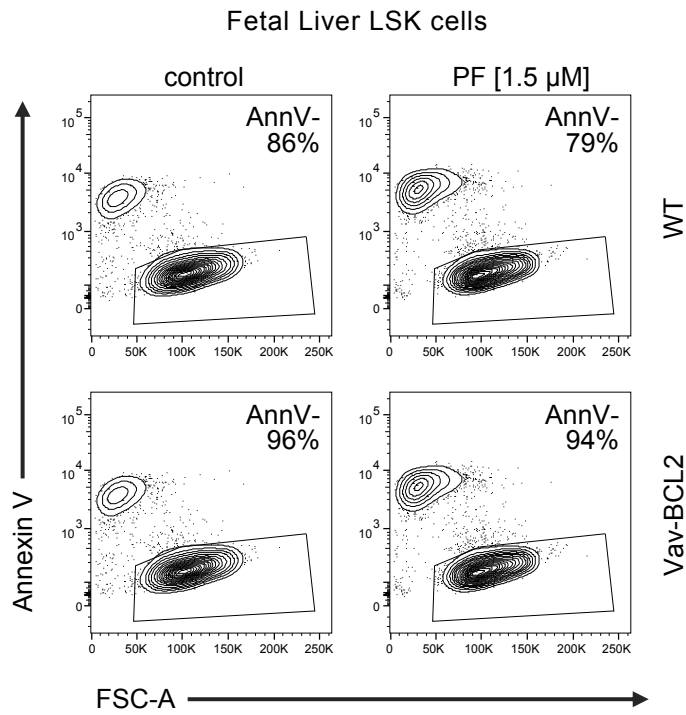

B

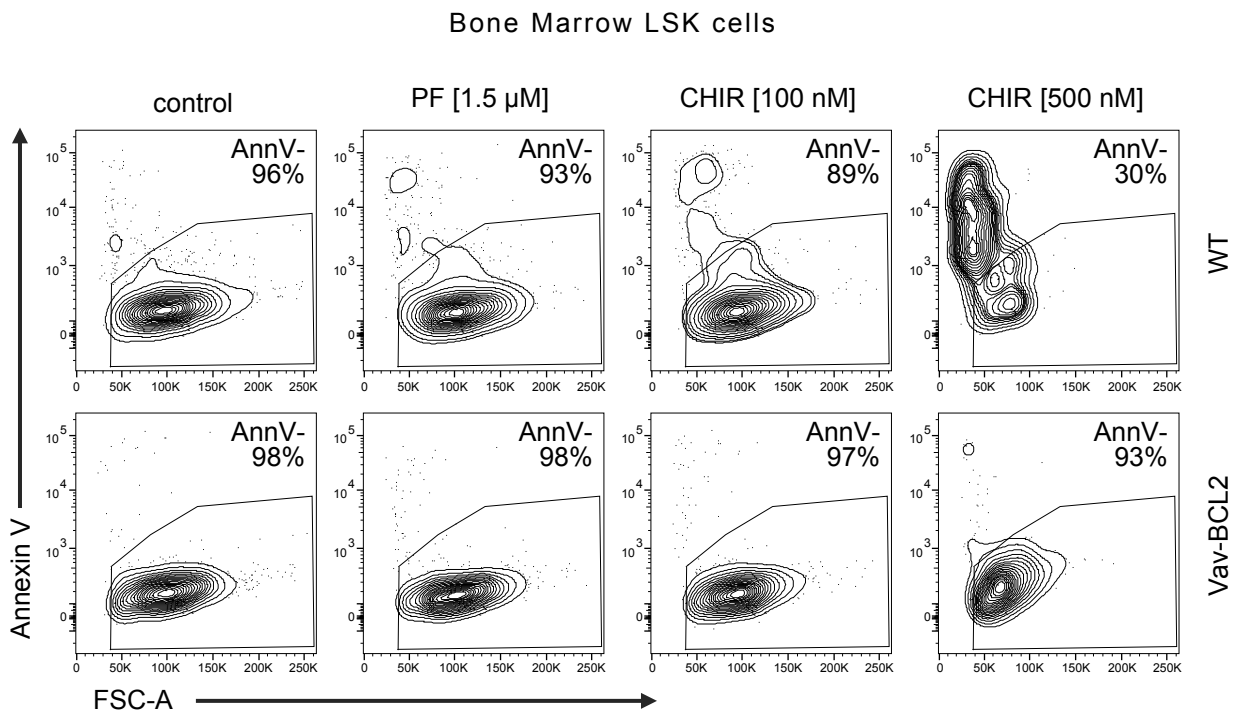

**Appendix Figure S1: CHK1-inhibition kills primary murine hematopoietic stem and progenitor (HSPC) cells.**

**(A, B)** Gating strategy (for Figure 2A) used to determine cell death (Annexin V) in response to CHK1i of sorted Fetal liver-LSK **(A)** and Bone Marrow LSK **(B)** cells.

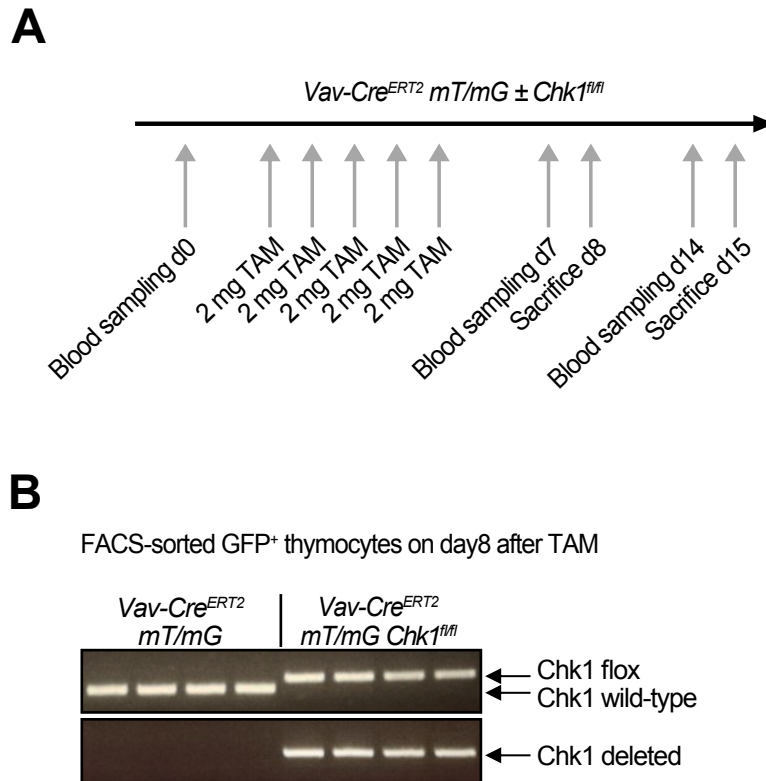

**Appendix Figure S2: Tracing acute depletion of Chk1 in the hematopoietic system based on GFP-reporter expression**

**(A)** Scheme of tamoxifen (TAM) administration by gavage (5 x 2 mg in 200  $\mu$ l/mouse, daily), blood or tissue sampling times using *Chk1<sup>fl/fl</sup> VavCRE<sup>ERT2</sup> mT/mG* (*Chk1<sup>fl/fl</sup>*) or *VavCRE<sup>ERT2</sup> mT/mG* (control) mice.

**(B)** PCR analysis amplifying the Chk1 wt, floxed and deleted allele in FACS-sorted GFP<sup>+</sup> thymocytes of individual mice on day 8 after the first administration of tamoxifen.

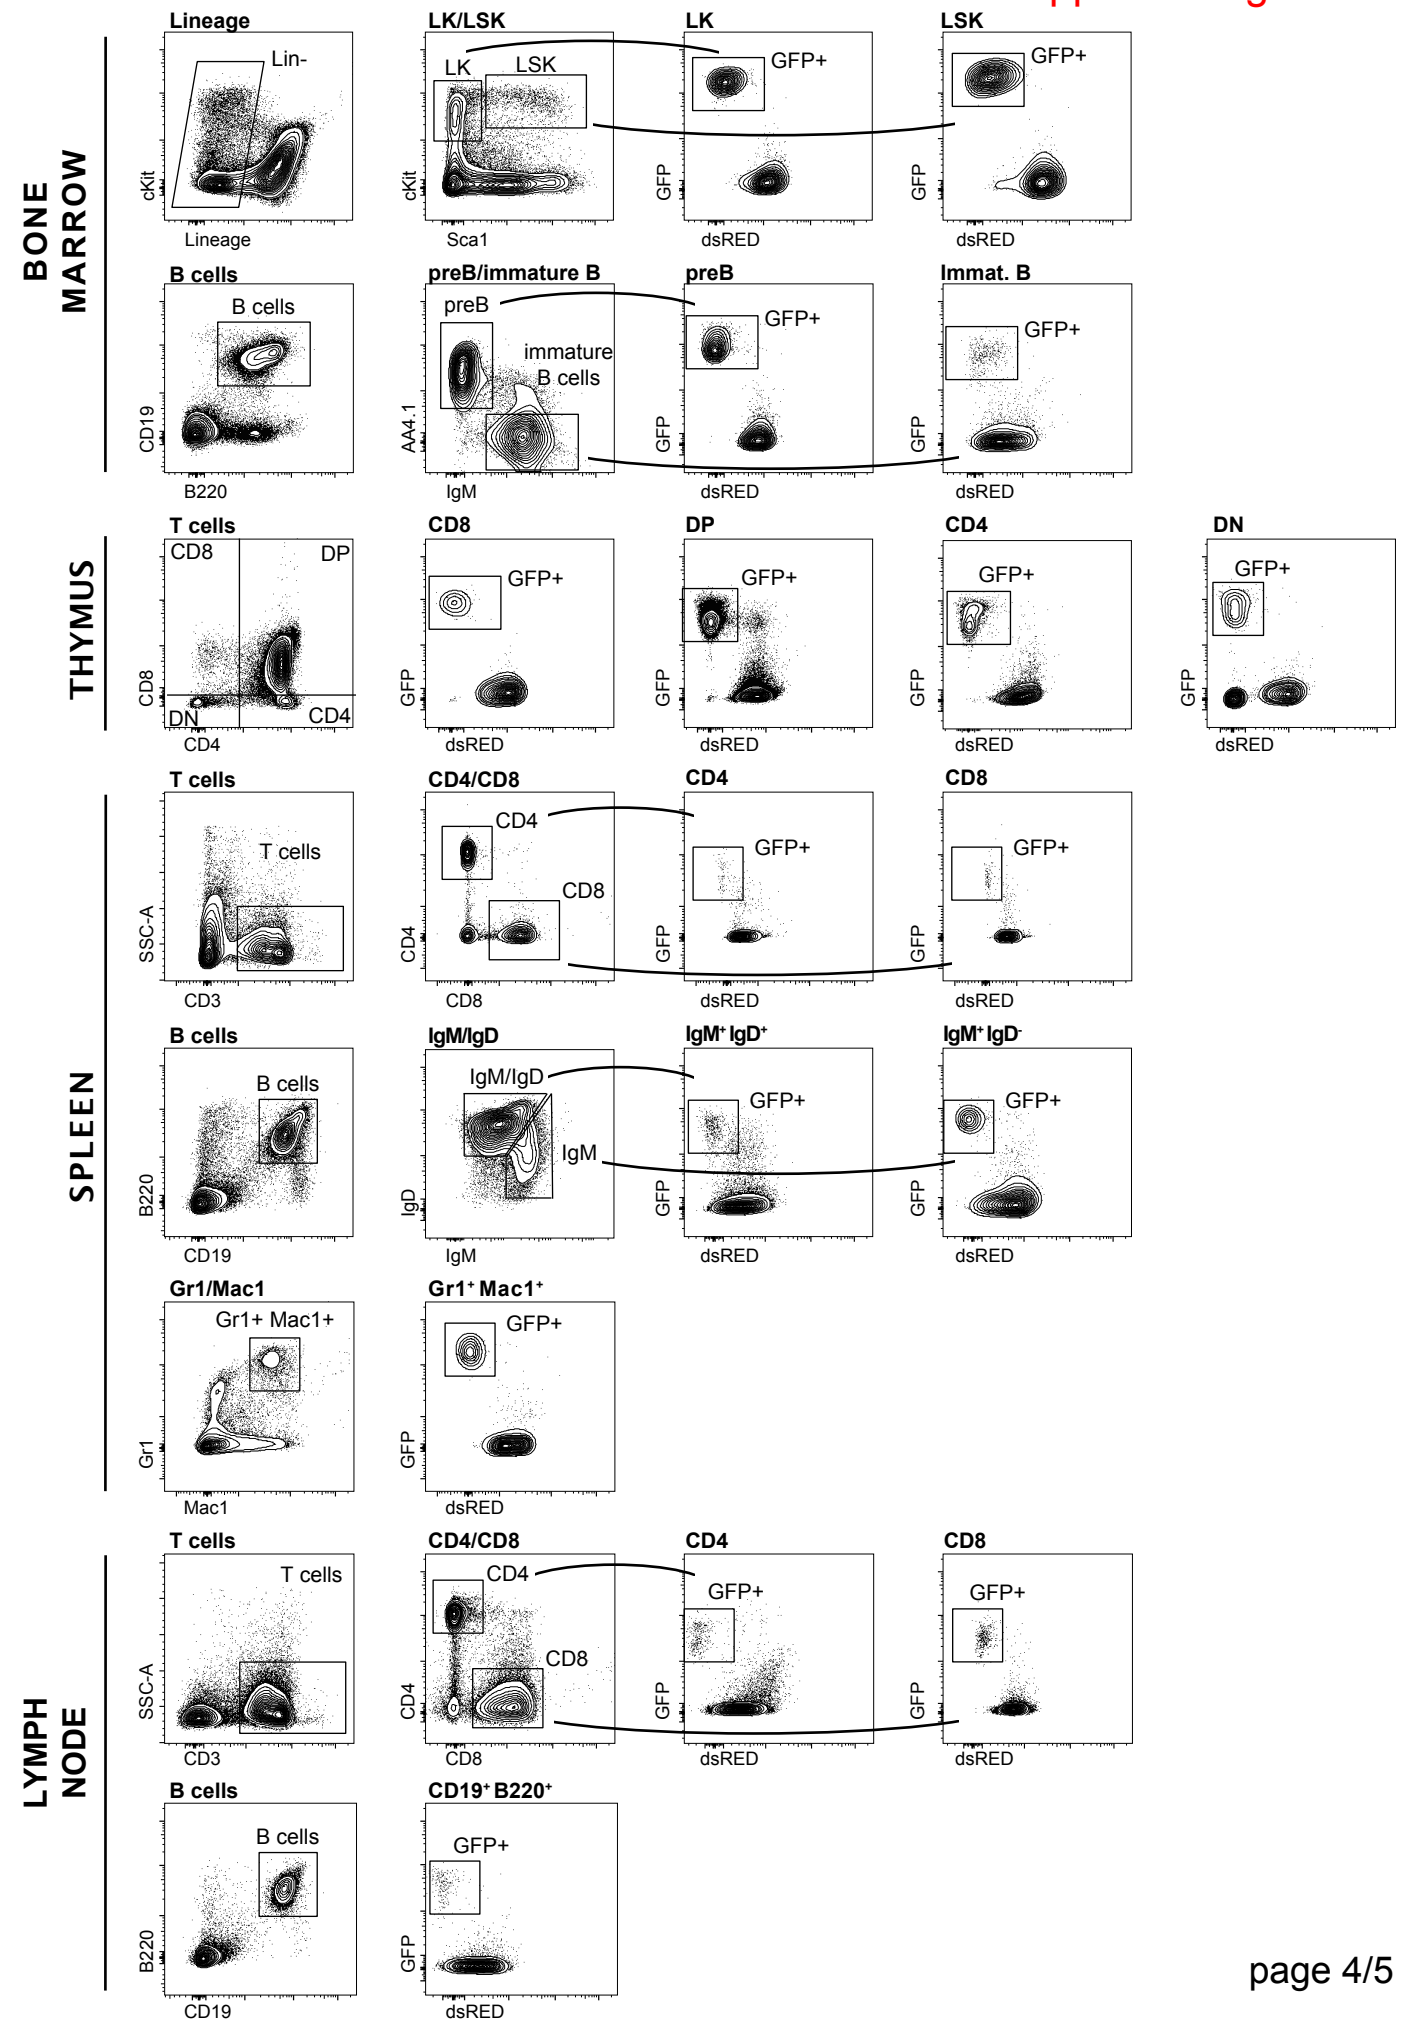

**Appendix Figure S3: Tracing acute depletion of Chk1 in the hematopoietic system based on GFP-reporter expression**

Gating strategy for the quantification of different hematopoietic cell subsets in *Vav-Cre<sup>ERT2</sup> mT/mG* (ctrl) and *Vav-Cre<sup>ERT2</sup> mT/mG Chk1<sup>fl/fl</sup>* (flox) mice 8 or 15 days after the first administration of tamoxifen, shown in Figure 8 and in Table EV1.
