# Supplementary material for: Checkpoint kinase 1 is essential for fetal and adult hematopoiesis
Source: PubMed Central journal article supplement (PMC6680171; doi:10.15252/embr.201847026), 2019-06-17
Supplement: EMBR-20-e47026-s002.pdf [file EMBR-20-e47026-s002.pdf]

## Expanded View Figures

**Figure EV1. Inhibition of CHK1 results in BCL2-regulated cell death involving BIM in MPP-like Hoxb8-FL cells.**

A Quantification and significant differences in the subG1 (left) and G1 fraction (right) of Hoxb8-FL cells of the indicated genotypes treated with CHK1i. The corresponding analysis of cell cycle distribution (subG1, G1, S, G2, polyploid) is shown in Fig 1A.

B Hoxb8-FL cells of the indicated genotypes were treated for 24 h with the inhibitors PF-477736 (PF) or CHIR-124 (CHIR) and analyzed by Nicoletti staining.

C Quantification of subG1 cells as a surrogate for cell death induced by CHK1i in Hoxb8-FL cells of the indicated genotypes.

Data information: Bars represent means  $\pm$  s.e.m. ( $n = 3$ /per genotype). Asterisks indicate significant differences compared to control (DMSO): \* $P < 0.05$ , \*\* $P < 0.01$ , \*\*\* $P < 0.001$  using unpaired Student's  $t$ -test.

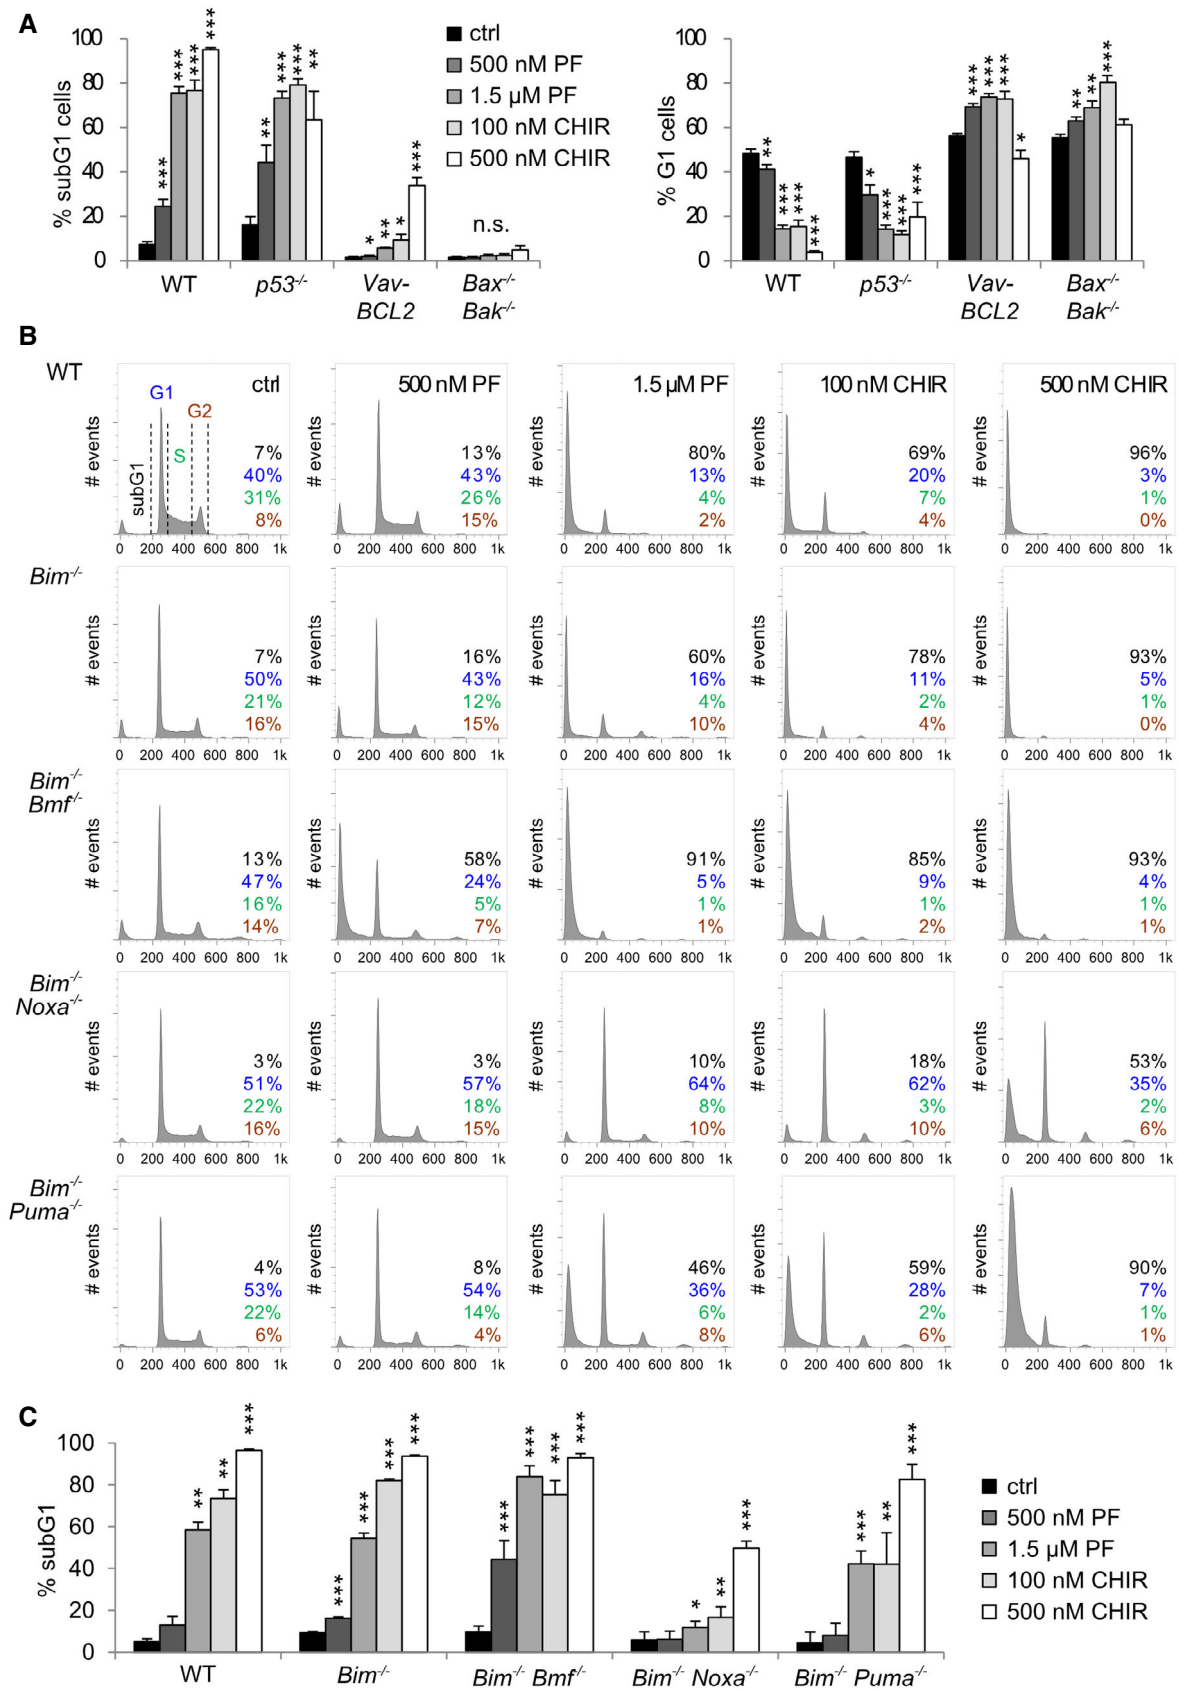

Figure EV1.

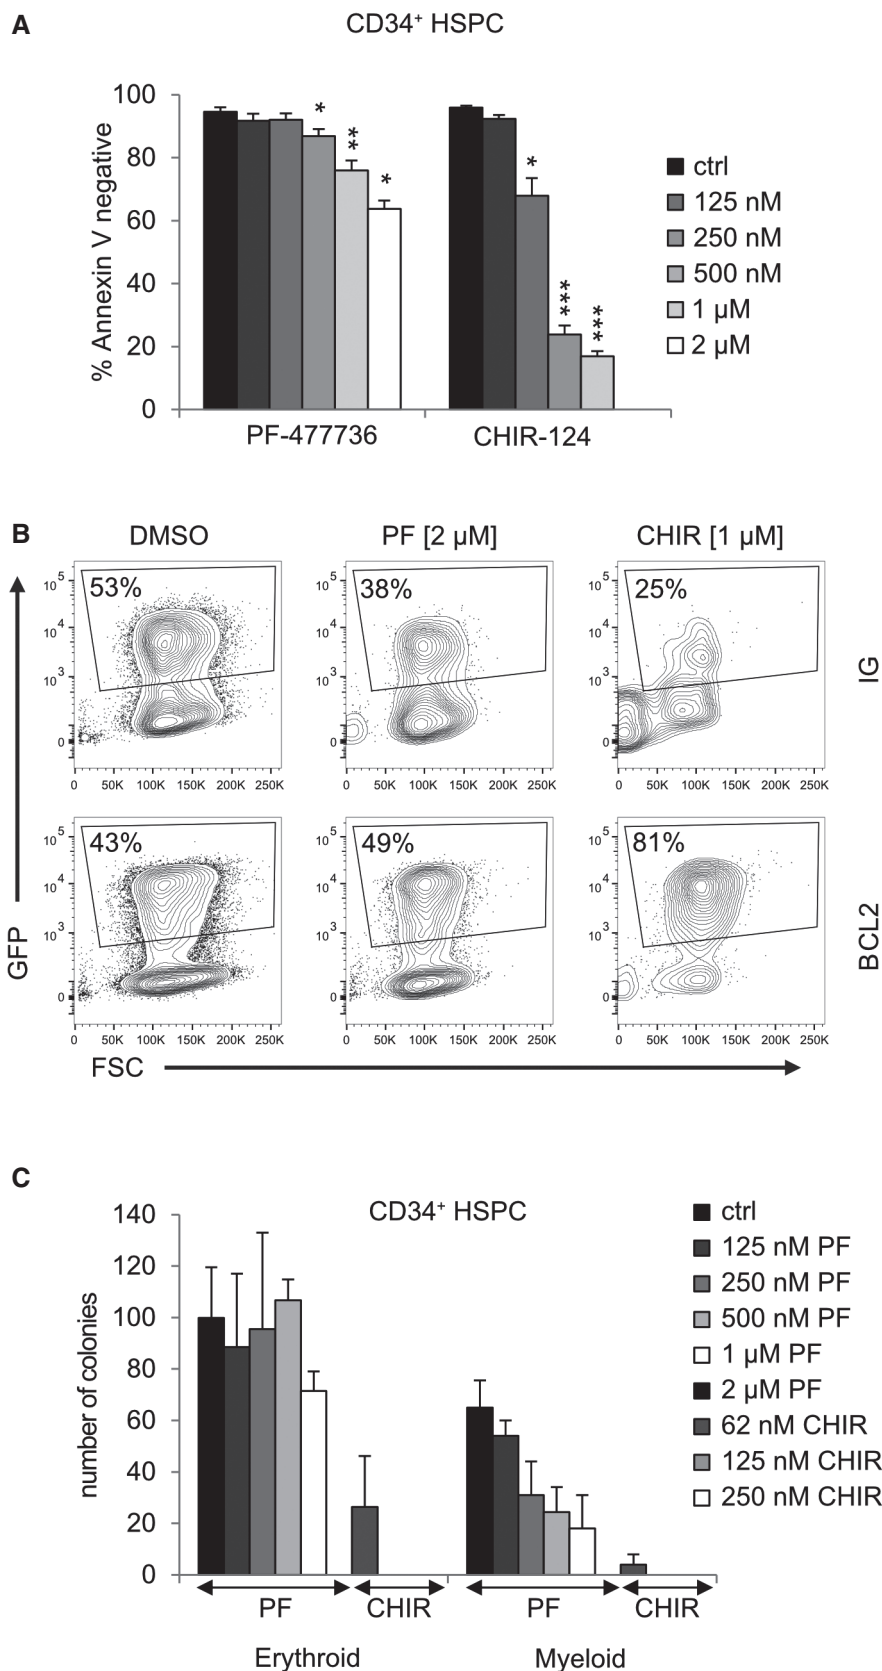

**Figure EV2. Human CD34<sup>+</sup> HSPCs undergo a BCL2-regulated apoptotic cell death in response to CHK1 inhibition.**

**A** MACS-purified CD34<sup>+</sup> human cord blood-derived HSPCs were treated for 48 h with graded doses of PF-477736 or CHIR-124. Cell death was assessed using Annexin V/7-AAD staining and flow cytometry. *N* = 4/genotype.

**B** Related to Fig 3C: CD34<sup>+</sup> cells were transduced with a lentiviral empty vector (IG) or a vector encoding BCL2, along with IRES-GFP, followed by CHK1i application for 48 h. Shown here are the percentages of GFP<sup>+</sup> cells within living cells.

**C** CD34<sup>+</sup> HSPCs was assessed for their colony formation capacity in methyl cellulose assays in the presence of graded doses of CHK1i. Colonies were counted 10 days postseeding of 1,000 CD34<sup>+</sup> cells. “Myeloid colonies” include granulocyte/monocyte, monocyte, granulocyte, and GEMM (granulocyte, erythroid, monocyte/macrophage, and megakaryocyte) colonies. *N* = 3–6 donors.

Data information: Bars represent means ± s.e.m. Asterisks indicate significant differences: \**P* < 0.05, \*\**P* < 0.01, \*\*\**P* < 0.001 using unpaired Student's *t*-test.

**Figure EV3. Deletion of *Chk1* in HSC prevents fetal erythropoiesis.**

- A Related to Fig 4E: Representative dot-plots used to quantify different erythroid cell populations in the fetal liver at E13.5 of the different genotypes.
- B Quantification of the relative distribution of the cell population shown in (A). Large “EryA” erythroblasts (CD71<sup>high</sup> Ter119<sup>high</sup> FSC<sup>high</sup>), smaller, more mature “EryB” erythroblasts (CD71<sup>high</sup> Ter119<sup>high</sup> FSC<sup>low</sup>); most mature erythroblast subset is EryC (CD71<sup>low</sup> Ter119<sup>high</sup> FSC<sup>low</sup>). Bars represent means  $\pm$  s.e.m. ctrl  $N = 5$  ( $N = 4$  *Chk1<sup>fl/+</sup>* and  $N = 1$  *Chk1<sup>fl/+</sup> Vav-Cre*),  $N = 3$  for *Chk1<sup>fl/-</sup> Vav-Cre*. Asterisks indicate significant differences: \* $P < 0.05$ , \*\* $P < 0.01$ , \*\*\* $P < 0.001$  using unpaired Student's *t*-test.

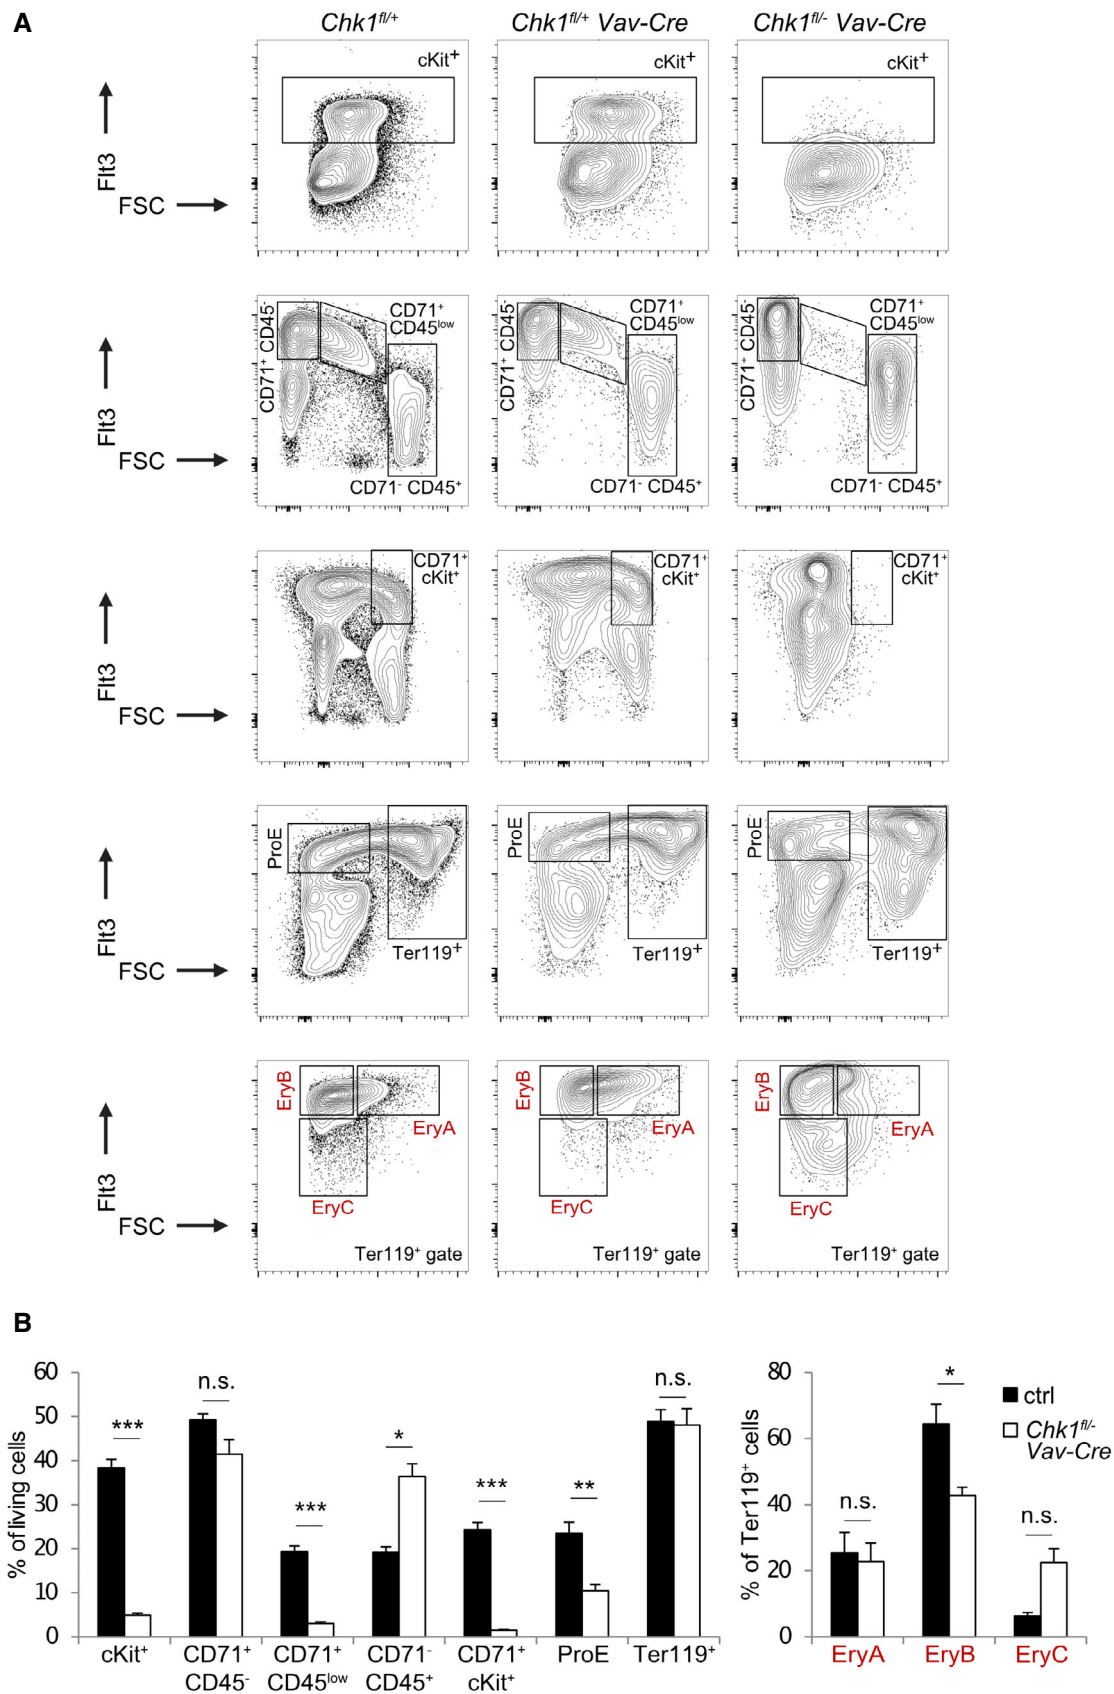

Figure EV3.

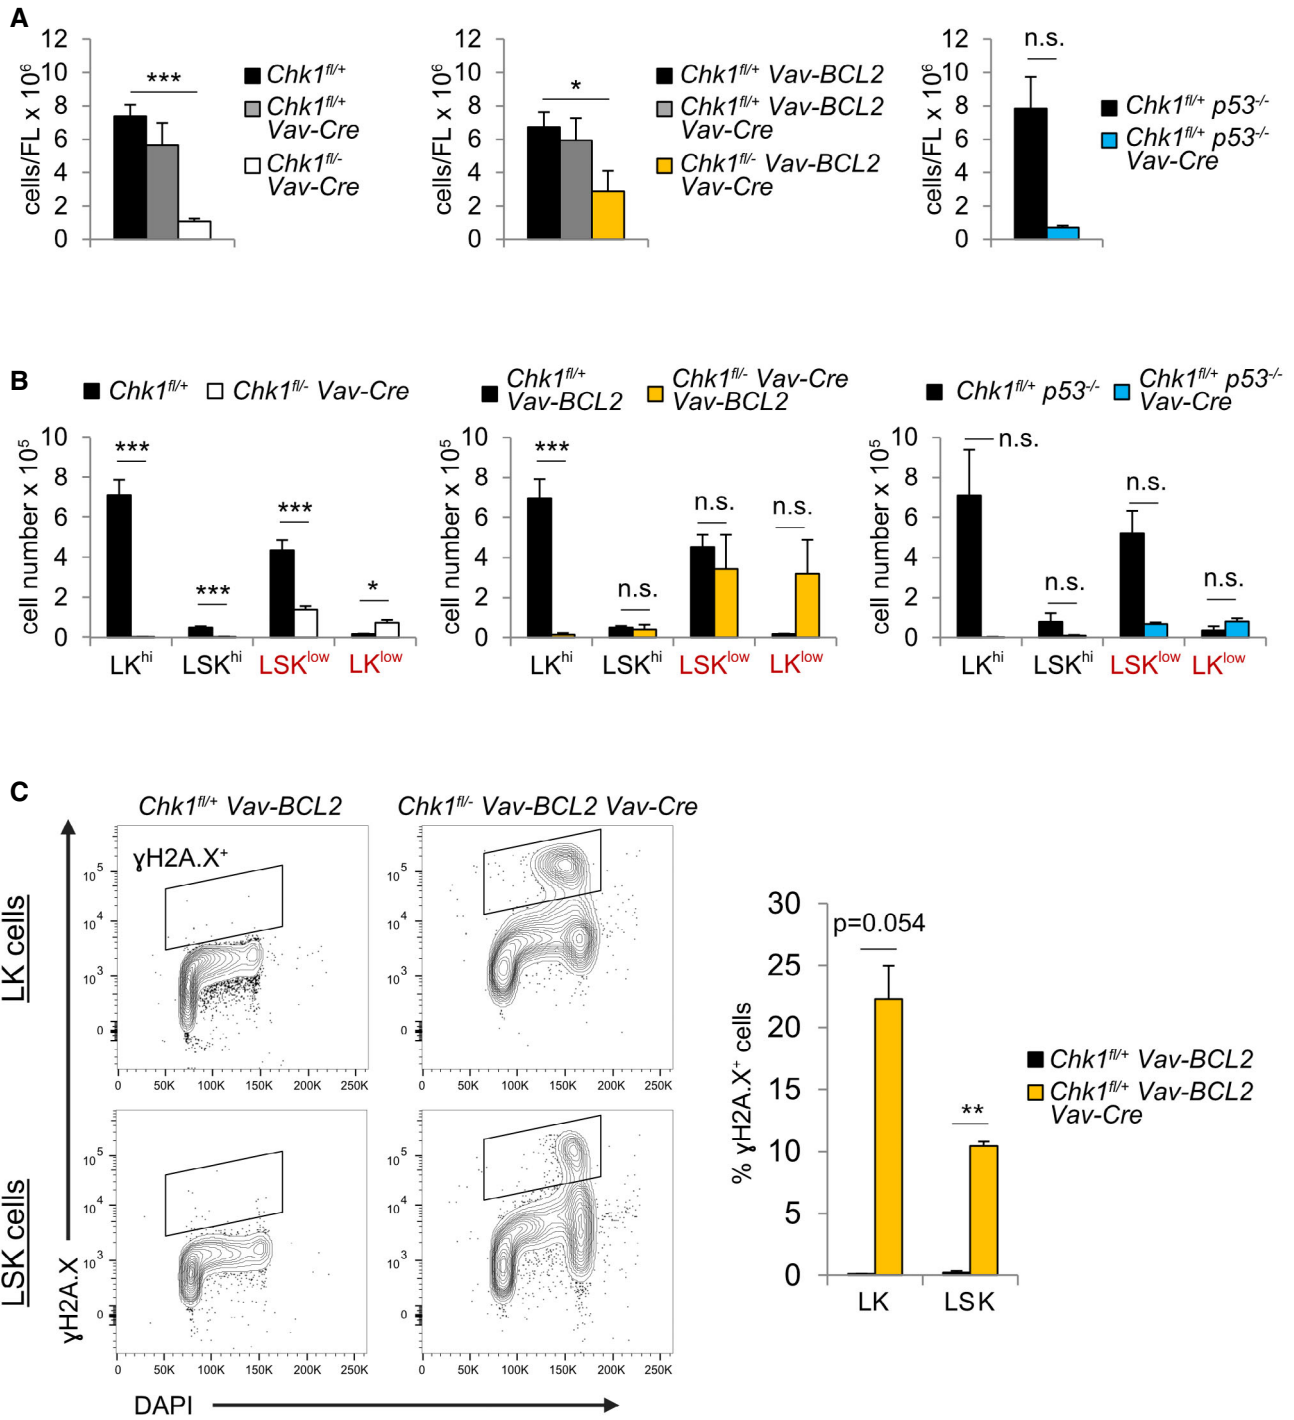

**Figure EV4. BCL2 overexpression does not prevent DNA damage nor stem cell loss upon CHK1 deletion.**

A Quantification of the total cell number found in the E13.5 fetal liver of the indicated genotypes.

B Calculation of the LK<sup>hi</sup>/LK<sup>low</sup> and LSK<sup>hi</sup>/LSK<sup>low</sup>-cell number per fetal liver at E13.5 of the indicated genotypes.

C LK and LSK cells of the indicated genotypes were sorted from E13.5 fetal livers and immediately fixed in 70% EtOH. Fixed cell suspensions were stained for  $\gamma$ H2A.X and DAPI intracellularly. Shown here are representative dot-plots (left) and quantification (right) of *N* = 2 animals per genotype; means  $\pm$  s.d.

Data information: For (A) and (B): *Chk1*<sup>fl/+</sup> (*n* = 21 embryos from 5 litters, 21/5), *Chk1*<sup>fl/+</sup> *Vav-Cre* (*n* = 5/5), *Chk1*<sup>fl/-</sup> *Vav-Cre* (*n* = 5/3), *Chk1*<sup>fl/+</sup> *Vav-BCL2* (*n* = 16/5), *Chk1*<sup>fl/+</sup> *Vav-Cre* *Vav-BCL2* (*n* = 7/3), *Chk1*<sup>fl/-</sup> *Vav-Cre* *Vav-BCL2* (*n* = 5/3), *Chk1*<sup>fl/+</sup> *p53*<sup>-/-</sup> (*n* = 2/1), and *Chk1*<sup>fl/-</sup> *Vav-Cre* *p53*<sup>-/-</sup> (*n* = 4/2). Data information for (A–C): Asterisks indicate significant differences: \**P* < 0.05, \*\**P* < 0.01, \*\*\**P* < 0.001 using unpaired Student's *t*-test.

**Figure EV5. Blood cell analysis after tamoxifen administration.**

Quantification of cellular parameters of peripheral blood cells sampled from *Vau-Cre<sup>ERT2</sup> mT/mG* (ctrl) and *Vau-Cre<sup>ERT2</sup> mT/mG Chk1<sup>fl/fl</sup>* (floxed) mice on day 7 or day 14 after the first administration of tamoxifen. Values represent means  $\pm$  s.e.m. of two independent experimental cohorts (Day 0  $N = 12$  ctrl,  $N = 11$  flox, Day 7  $N = 11$  ctrl,  $N = 14$  flox, Day 14  $N = 4$  ctrl,  $N = 8$  flox). Two-way ANOVA analysis revealed no significant differences between the two experimental groups in either of the parameters analyzed. Abbreviations: WBC ( $10^3/\text{mm}^3$ ), white blood cells; RBC ( $10^6/\text{mm}^3$ ), red blood cells; HGB (g/dl), hemoglobin; HCT (%), hematocrit; PLT ( $10^3/\text{mm}^3$ ), platelets; %Lymph, percentage of lymphocytes; %MO, percentage of monocytes; %GRA, percentage of granulocytes; MCV ( $\mu\text{m}^3$ ), mean corpuscular volume; MCH (pg), mean corpuscular hemoglobin; MCHC (g/dl), mean corpuscular hemoglobin concentration; RDW [%], red cell distribution width; MPV ( $\mu\text{m}^3$ ), mean platelet volume; #LYM ( $10^3/\text{mm}^3$ ), number of lymphocytes; #MO ( $10^3/\text{mm}^3$ ), number of monocytes; #GRA ( $10^3/\text{mm}^3$ ), number of granulocytes.

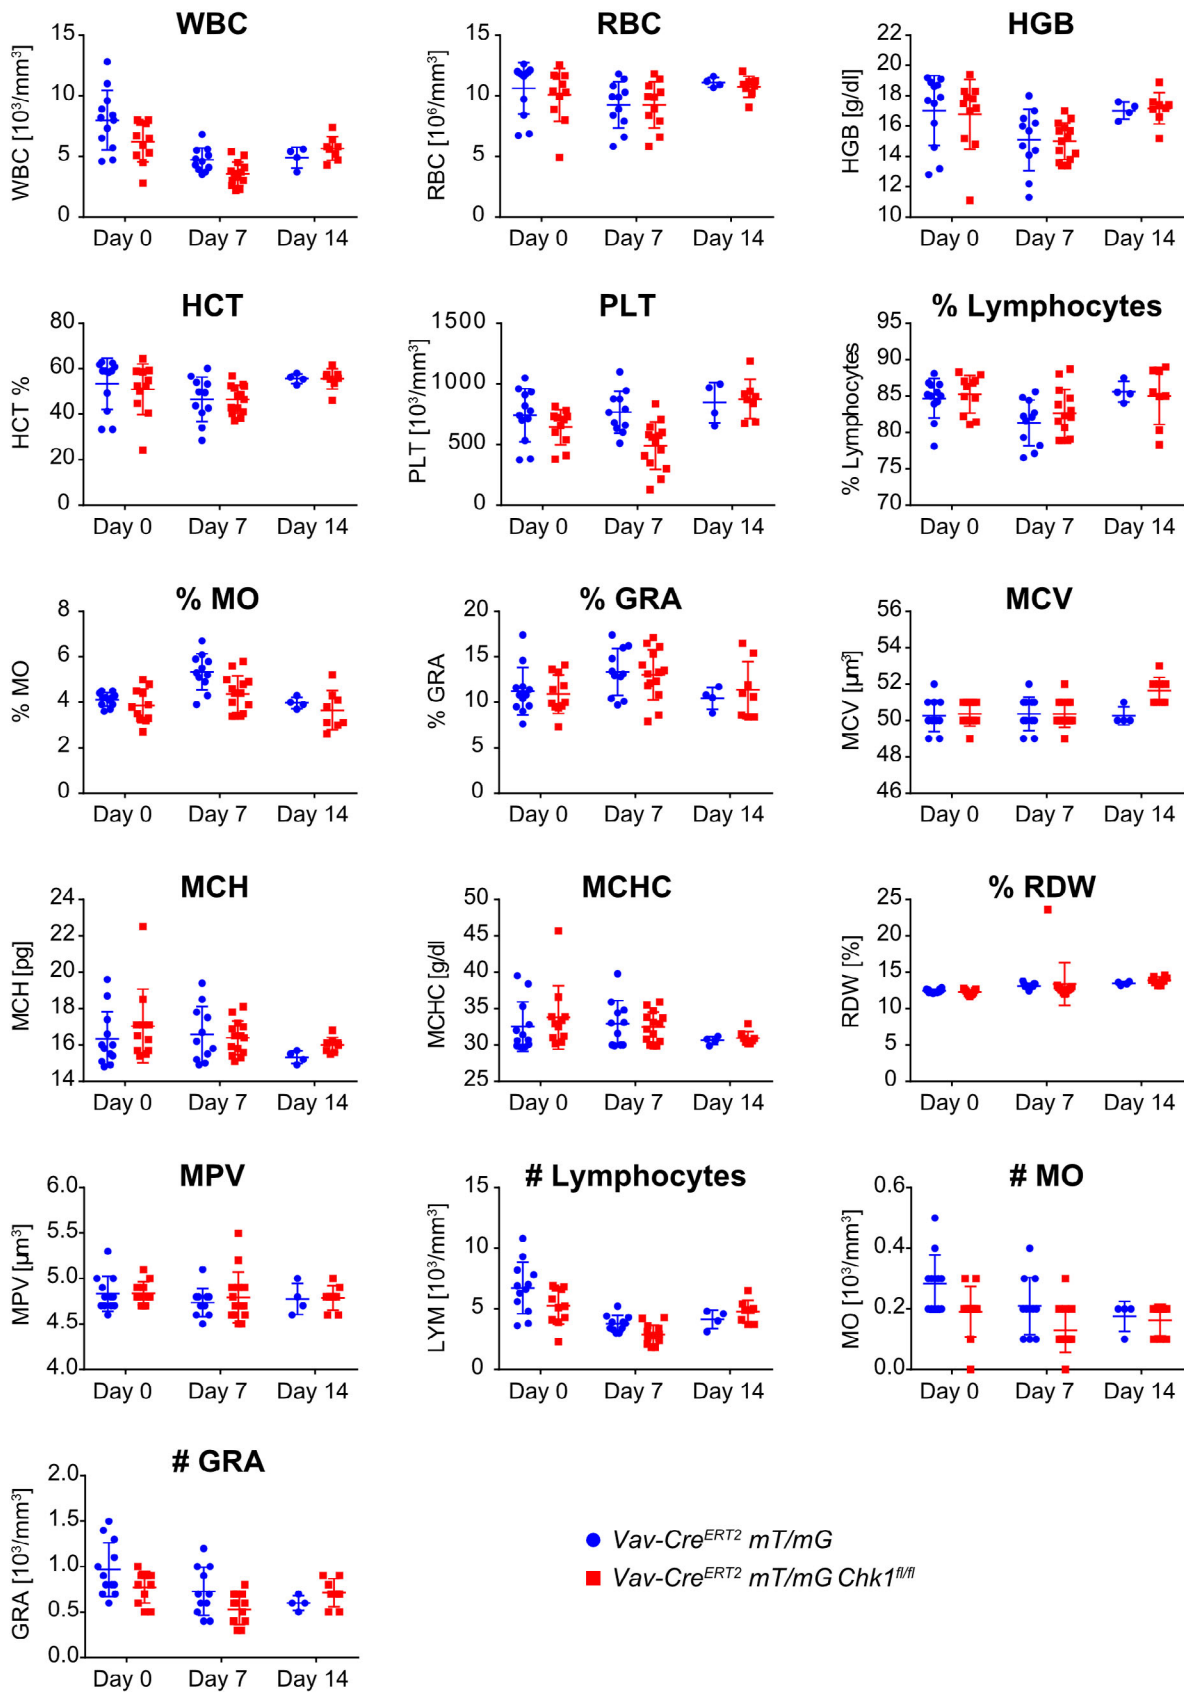

Figure EV5.
