# Supplementary material for: Checkpoint kinase 1 is essential for fetal and adult hematopoiesis
Source: PubMed Central journal article supplement (PMC6680171; doi:10.15252/embr.201847026), 2019-06-17

# Uncropped Western Blots

Schuler et al\_Fig. 1C

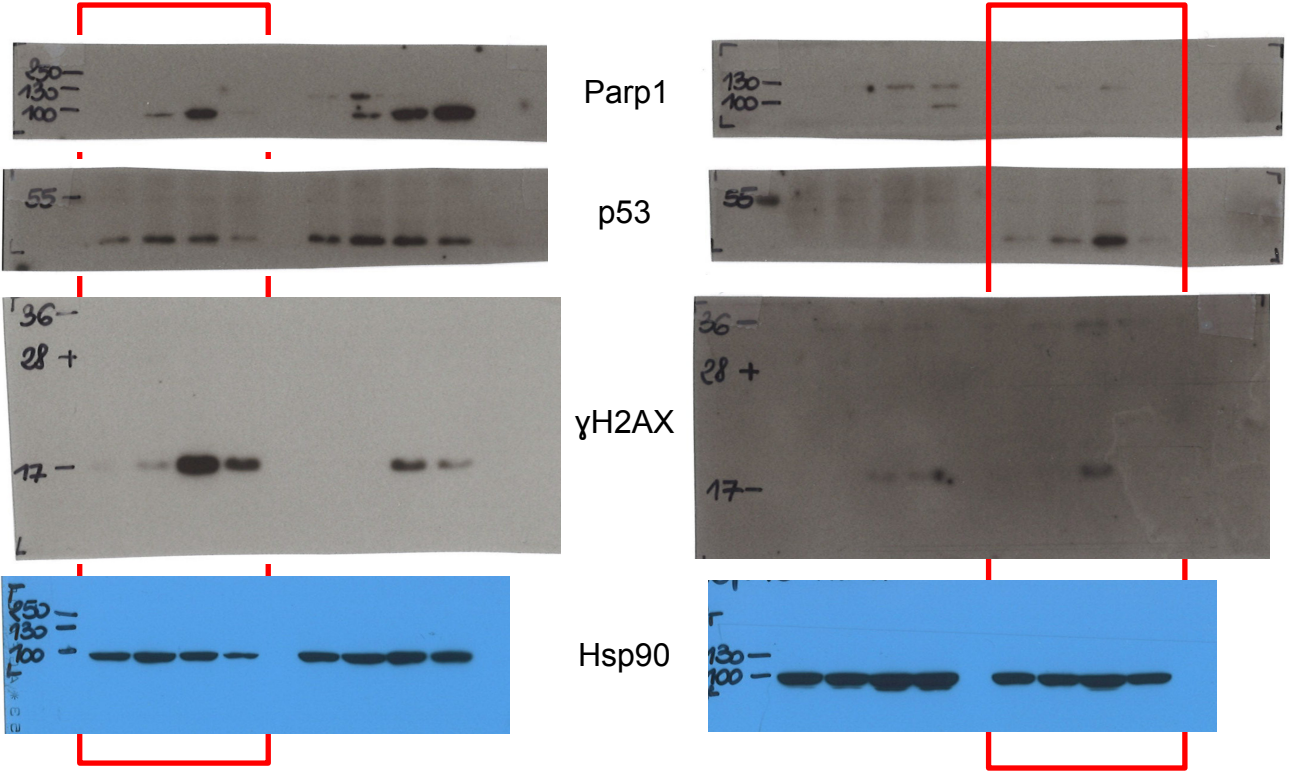

Supplement: EMBR-20-e47026-s004.pdf [file EMBR-20-e47026-s004.pdf]
